# Supplementary material for: The Associations between Evacuation Status and Lifestyle-Related Diseases in Fukushima after the Great East Japan Earthquake: The Fukushima Health Management Survey
Source: MDPI journal article supplement (doi:10.3390/ijerph19095661), 2022-05-06
Supplement: s1 [file s1]

**Table S1.** Global Moran index of the spatial distribution of the prevalence of lifestyle-related diseases by administrative division among examinees

|              | <i>P</i> | Z score | Moran's index |
|--------------|----------|---------|---------------|
| Diabetes     | 0.07     | 1.78    | 0.17          |
| Hypertension | 0.04     | 2.04    | 0.16          |
| Dyslipidemia | 0.01     | 4.25    | 0.34          |
